# Supplementary material
Source: publisher site journal article supplement (https://www.dovepress.com/get_supplementary_file.php?f=476168.docx)
Supplement: Supplementary file 1 [file get_supplementary_file.php]

**Table S1.** Primer sequences used for qRT-PCR in this study

| **Genes** | **Sequence of the primer (5’-3’): F** | **Sequence of the primer (5’-3’): R** |
| --- | --- | --- |
| *β-actin* | CCCAGACATCAGGGAGTGAT | TCTCTGTTGGCTTTGGGATT |
| *myh7* | CGTCAGTCGTGAAGGTGACA | GAGGGTTCTGGGGGTGAATG |
| *myh6* | GCAACATGGAGGGCGAGATA | CACTTTGCATTCACCGCCTC |
| *tpm1* | GAGGACGAGCGCGATAAAGT | ATCACCTTCAGCCTTGGTGG |
| *tnnt2a* | CAGAGTCAGTGACCATCAGAAAAC | TTTCAACAGTGGTCAGCTCC |
| *nppa* | GATGTACAAGCGCACACGTT | TCTGATGCCTCTTCTGTTGC |
| *nkx2.5* | GTCCAGGCAACTCGAACTACTC | AACATCCCAGCCAAACCATA |
| *tbx5* | ATTCGCCGATAACAAATGG | CGCCTTGACGATGTGGAT |
| *tbx20* | CGAGACGGTTTTCACTTGCAG | TCCCTCTCAATATCCGTGAGTC |
| *myl7* | AGGAGTTTAAGGAGGCTTTTGG | CCTTTTCCTTCTGTTAGCATGG |
| *cmlc1* | GGAAACGGAACAGTGATGGGTGCT | ACCCGGAGAGGATGTGCTTGATGA |
| *itgb3b* | ACGAGGACAACAGTGGCAAA | CTTCGCAAATTCACGCCGAT |
| *itgb1b* | TCGTGCTTCCTAATGACGGG | GGAGTCGGAGGTAAGCGTTC |
| *vaspa* | CGCTGGTTCGAGGGATGAAA | GCCTCCTCTTTACTGCCGAA |
| *pak6b* | CGCAAACAGCAGAGGAGAGA | CAACGTCAGCAGGATGGAGT |
| *mylpfb* | TCTGACCACCCAATGTGACC | GCAGATGAACCATGACGGAC |
| *igf1ra* | GCTCCGATCCAAAGAGCAGG | CCCTCGTCATGCCAAAGTCT |
| *shc3* | CTCTCCATGAACGCCAAGGT | ACAAGGTGCCAGACTCTTCG |
| *grb2b* | GTCCTCTGGTCCACAATAGGGAT | AAACCACGGATGTGCCTTCA |
| *ptk2aa* | TCATGTTCGGCATCAAGCCT | GCATGTTGAGGACTGGGGAA |
| *pik3cd* | CCCAGCGAAACCCTCTTGAT | TTGCTTTTGCATGGCAGGAC |
| *akt1* | TAAGGAGCGACCGCAAGATG | TGCAGGCAGCGTATGATGAA |
| *akt3b* | GTCTTTACTGTCTGGCTTACTC | ATGTGGTCTCCTTTCGCTAT |
| *itga4* | CCTGTGTCGAACCAAGTGAT | CGCGATGAAGCTGCTAACTG |
| *Ilk* | CCGTTCGGGTGTTGTGGATA | CTCGTTTGCCGCATTGGTAT |
| *parva* | CTTCAGTCCCGTCAAGTTATG | GTATCCAGTTCAGCGACCTCC |
| *vcla* | AGGACGCCTGGGCAAATAA | TCTGGACCGCCGTTAGGAT |
| *itgb1a* | GGGAAACTCGGAGGAATTGTG | CAGCGAAGATGGTCTGGATGT |

**Table S2.** Primer sequences used for WISH in this study

| **Genes** | **Sequence of the primer (5’-3’): F** | **Sequence of the primer (5’-3’): R** |
| --- | --- | --- |
| *myh7* | GTTTGAAGAGTCGCAAGCCG | AGGCTTGTGTTCTGGGAGTG |
| *myh6* | AGAGGAACGATGTGAGCAGC | TAGAGAGGCGGTAGTGGCTT |
| *tpm1* | GAAGAGAAGCTCCTGACCGC | CGAGCGTGTCCACTAGAACC |
| *tnnt2a* | GACGCTGATCGAAGCTCACT | TGACGTTTTCTGATGGTCACTG |
| *nppa* | TCAGAGGGCAAGAAAACGCA | TGTTACTTACTGAAGGCAAAGGTCA |
| *myl7* | TTCGACCCTAATGCCACAGG | TCTGTAGGGGGCAGCAGTTA |
| *cmlc1* | CATCCCAGCCTTTTCCCATCA | AATCTTTGCAGCGTCGGCTC |

**Table S3.** The antibodies used in this study

| Antibodies | Source | Identifier |
| --- | --- | --- |
| Mouse monoclonal anti-β-actin | Proteintech | 60008-1-IG |
| Rabbit polyclonal anti-FAK | Boster | PB0662 |
| Rabbit polyclonal anti-phospho-FAK(Tyr397) | Cell Signaling Technology | 8556P |
| Rabbit polyclonal anti-Paxillin | Proteintech | 10029-1-IG |
| Rabbit polyclonal anti-Vinculin | Proteintech | 26520-1-AP |
| HRP Conjugated AffiniPure Goat Anti-rabbit IgG (H+L) | Boster | BA1054 |
| HRP Conjugated AffiniPure Goat Anti-mouse IgG (H+L) | Boster | BA1050 |
